# Supplementary material
Source: PubMed Central journal article supplement (PMC9669217)
Supplement: NIHMS1836862-supplement-Supplemental_Material.pdf [file NIHMS1836862-supplement-Supplemental_Material.pdf]

**A**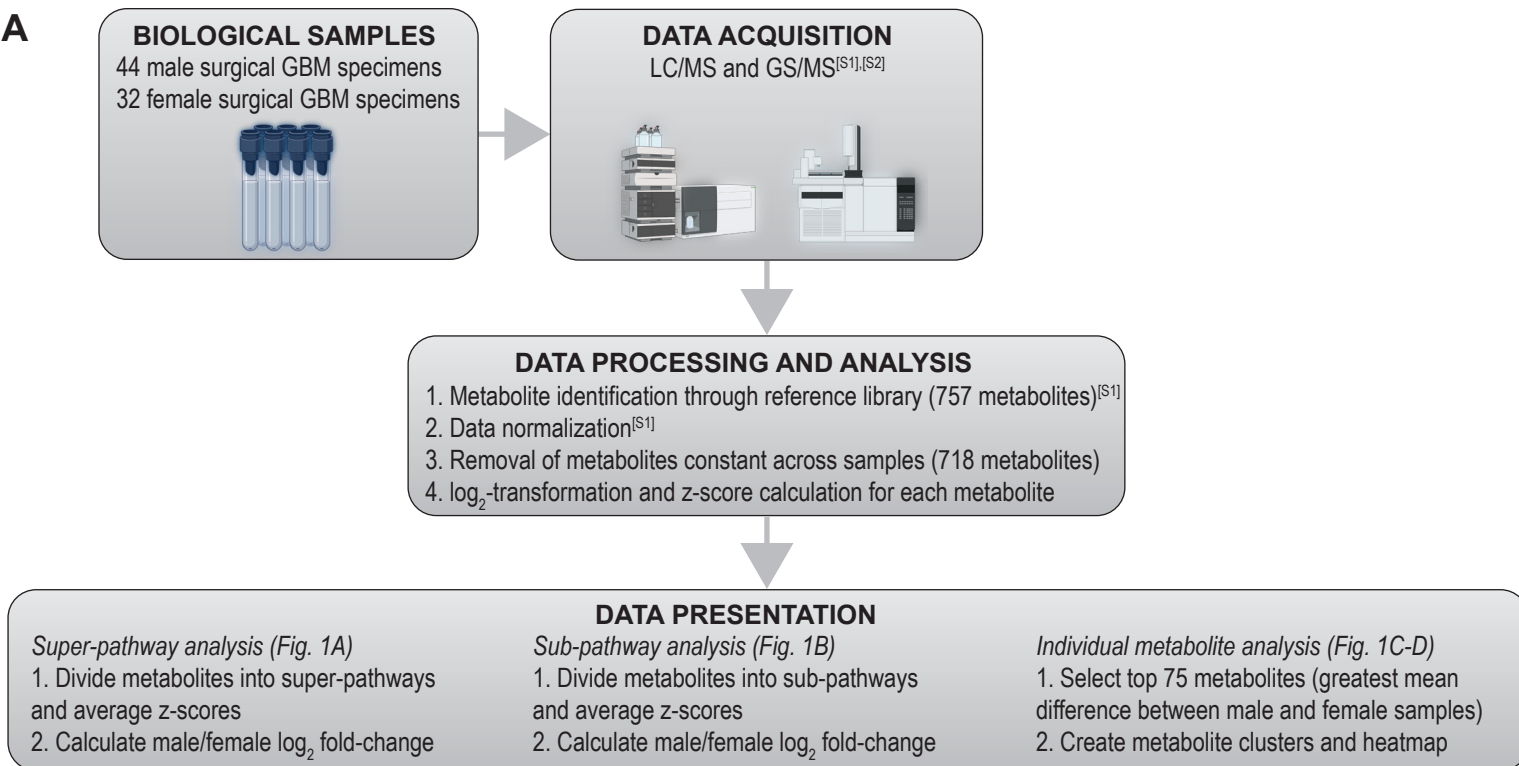**B**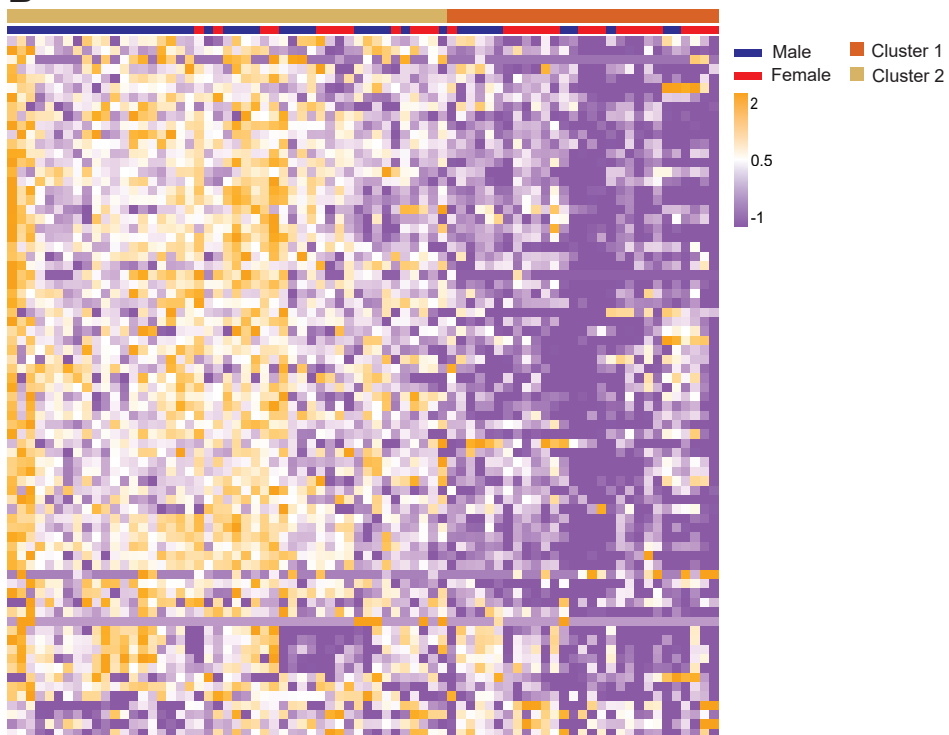**C**

|        | Cluster 1 = low metabolite abundance | Cluster 2 = high metabolite abundance |
|--------|--------------------------------------|---------------------------------------|
| Male   | 10                                   | 34                                    |
| Female | 19                                   | 13                                    |

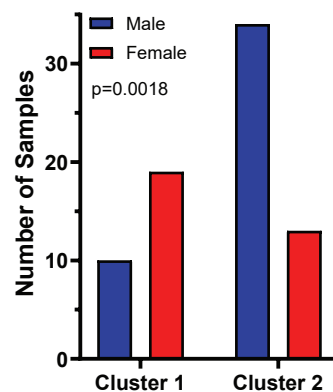

**Figure S1. Sex differences in GBM metabolite abundance parallel those found in serum, related to Figure 1 A,** Workflow of the methodology of data collection, analysis, and presentation of the human GBM surgical specimens. **B,** K-means clustering (n=2) of the top 75 metabolites (determined by greatest mean difference) of male (n=44) and female (n=32) GBM surgical specimens. Patient specimens and metabolites are represented in columns and rows, respectively. Cluster 1 represents the low metabolite abundance group; cluster 2 represents the high metabolite abundance group. **C,** Male and female tumor sample distribution in cluster 1 and cluster 2. \*\*\*p=0.0018; two-tailed Fisher's exact test.

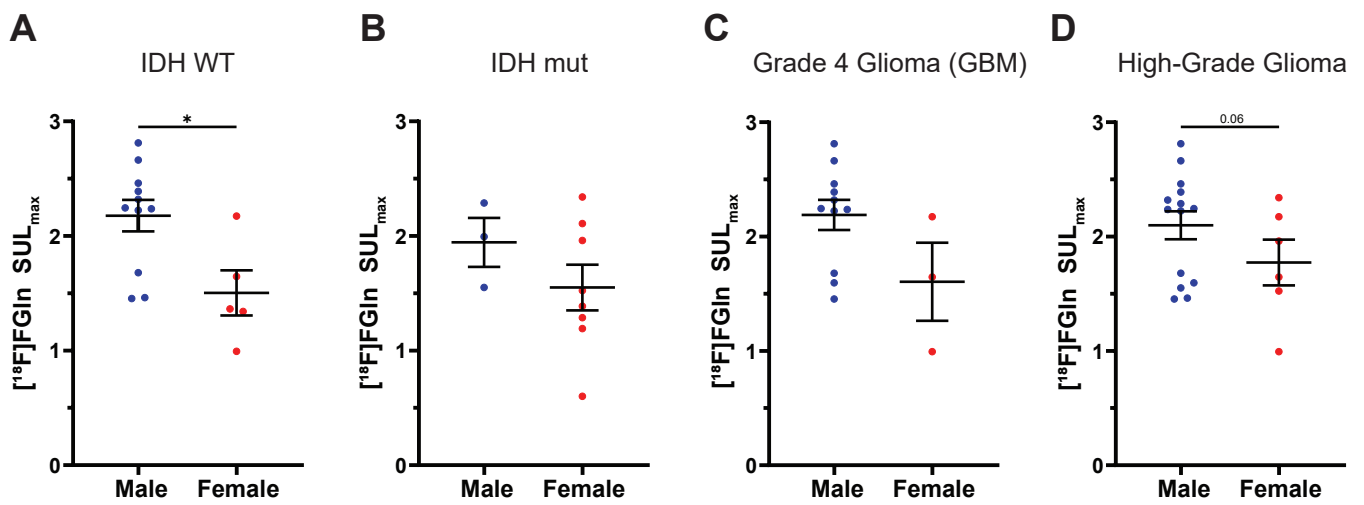

**Figure S2. Glutamine uptake in male and female patient glioma subsets, related to Figure 2 A-D.** Quantification of  $[^{18}\text{F}]\text{FGln}$  uptake in male and female IDH wild-type (WT) gliomas (**A**), IDH mutant (mut) gliomas (**B**), grade 4 gliomas (GBM) (**C**), and high-grade gliomas (HGG) (**D**) (SUL<sub>max</sub>). Data are mean +/- SEM of n=11 male and n=5 female IDH WT patients, n=3 male and n=8 female IDH mutant patients, n=11 male and n=3 female GBM, and n=14 male and n=6 female HGG. \*p<0.05; t-test.

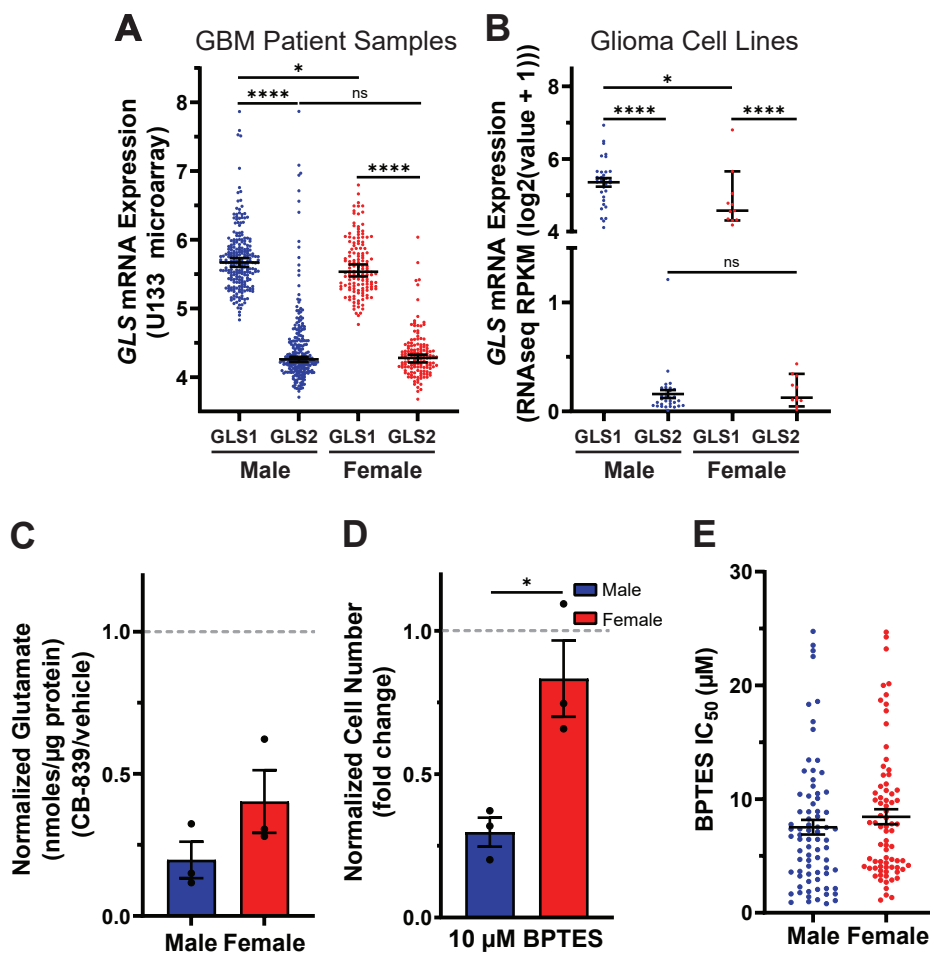

**Figure S3. GLS1 expression and dependency are greater in male transformed astrocytes and gliomas, related to Figure 4 A, GLS1 and GLS2 mRNA expression levels in n=232 male and n=139 female IDH wild-type GBM patient samples. Data are median +/- 95% CI. \*\*\*\*p<0.0001; Mann-Whitney test. B, GLS1 and GLS2 mRNA expression levels in n=32 male and n=11 female human glioma cell lines. Data are median +/- 95% CI. \*\*\*\*p<0.0001; Mann-Whitney test. C, Fold change of cellular glutamate levels of transformed astrocytes treated with CB-839 for 24 hrs. Glutamate levels were measured via targeted GS/MS analysis. Data are mean of n=3/sex and treatment (three independent experiments, one male and female cell line); t-test D, Cell number assay of transformed astrocytes treated with BPTES or vehicle. Data are mean +/- SEM of n=3/sex (three independent experiments, one male and female cell line). \*p<0.05; t-test. E, IC<sub>50</sub> values of male and female tumor cell lines treated with BPTES for 4 days (data obtained from Daemen et al. [S3]). Data are mean +/- SEM of n=77 male and n=76 female tumor cell lines; t-test.**

**A**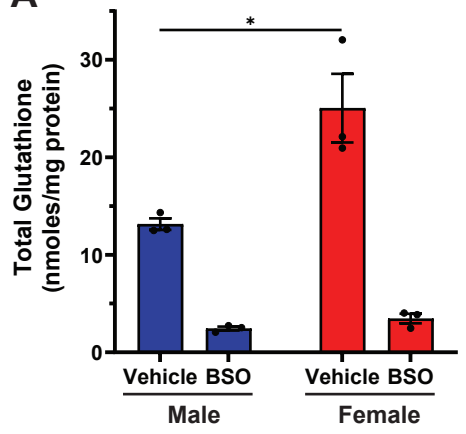**B**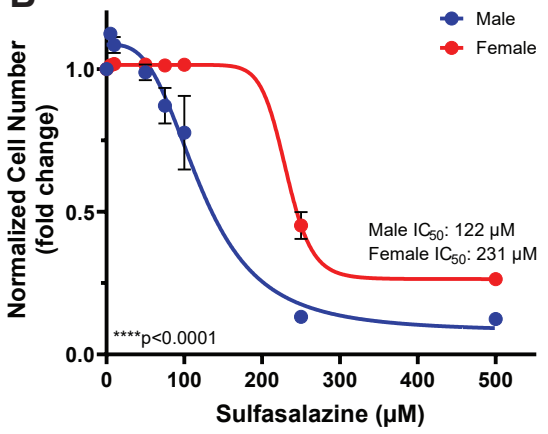**C**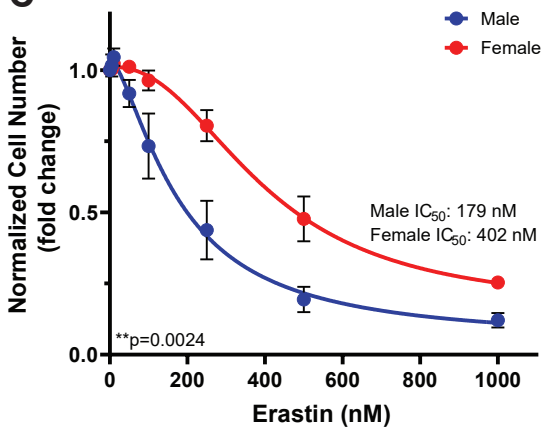**D**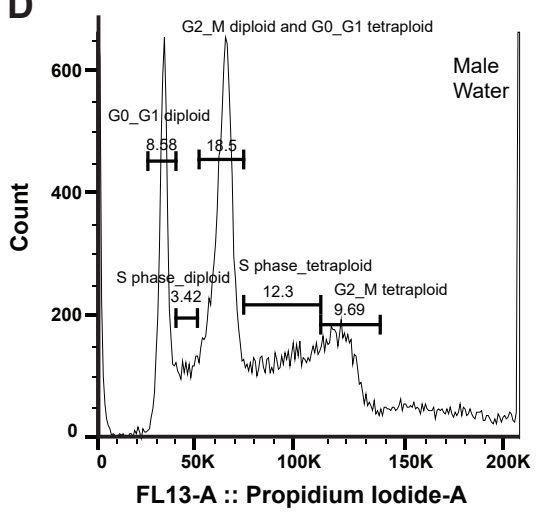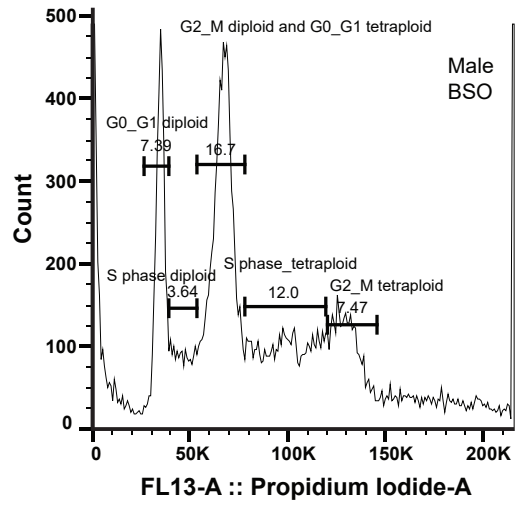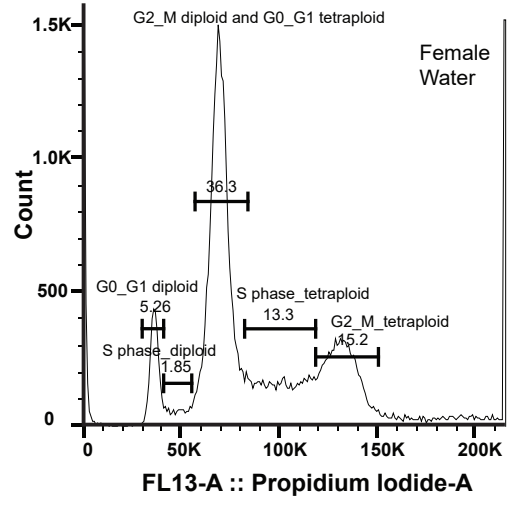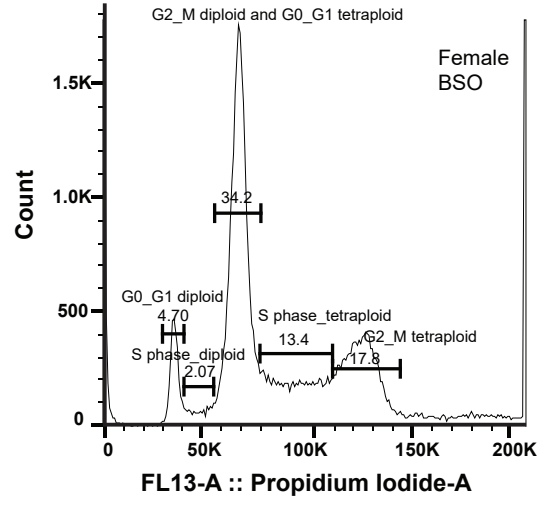

**Figure S4. Male transformed astrocytes are more dependent on glutathione for redox balance, related to Figure 5 A,** Total glutathione levels in transformed astrocytes treated with buthionine sulfoximine (BSO) or vehicle. Data are mean +/- SEM of n=3/sex (three independent experiments, one male and female cell line). \*p<0.05; t-test. **B-C**, Sulfasalazine (SAS) (**B**) and erastin (**C**) dose-response curves of transformed astrocytes. Data are mean +/- SEM of n=3/sex (three independent experiments, one male and female cell line). \*\*p=0.0024, \*\*\*\*p<0.0001; two-way ANOVA. **D**, Representative propidium iodide histograms of transformed astrocytes treated with BSO or vehicle. The cell cycle subfractions (G0/G1, S-phase, G2/M) are depicted for the diploid and tetraploid cell populations. Histograms shown are representative examples chosen from three independent experiments.

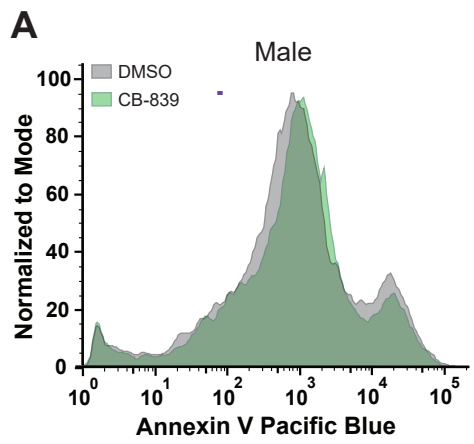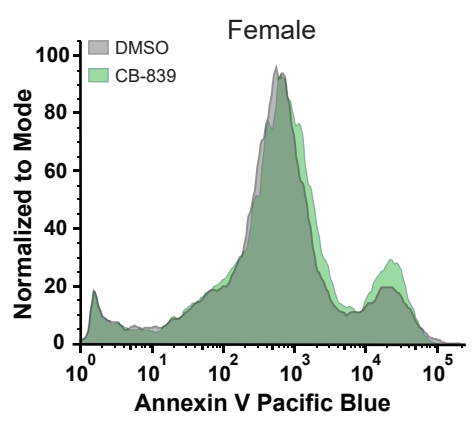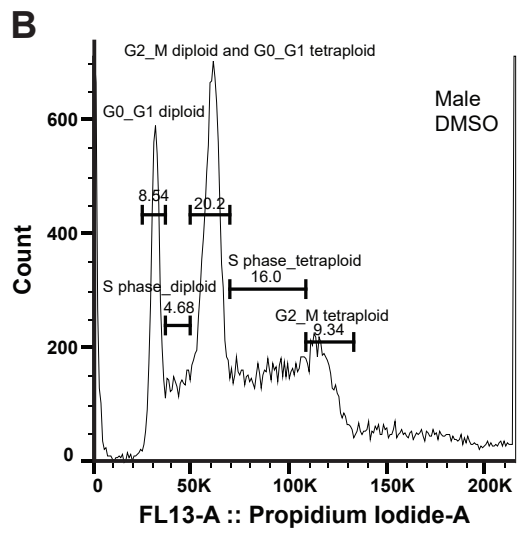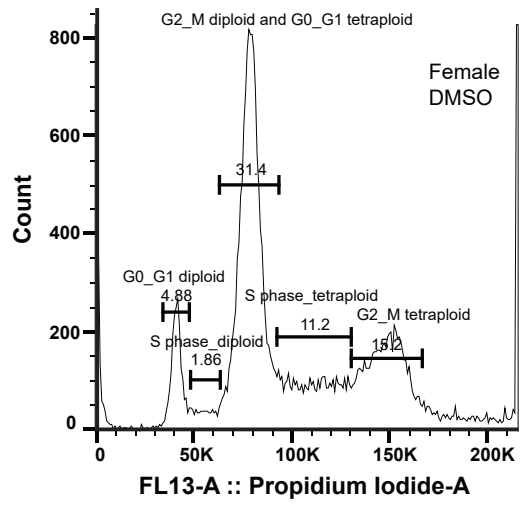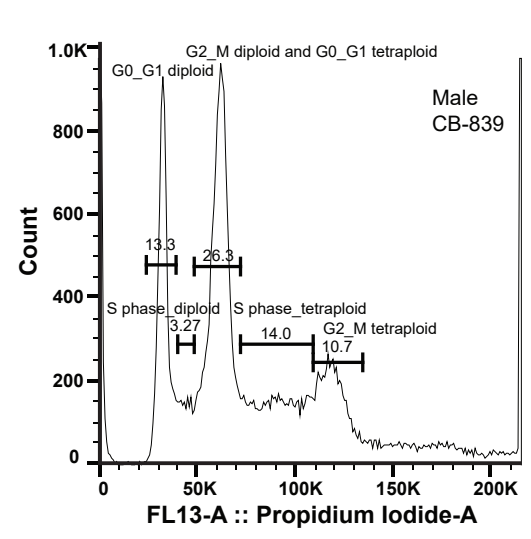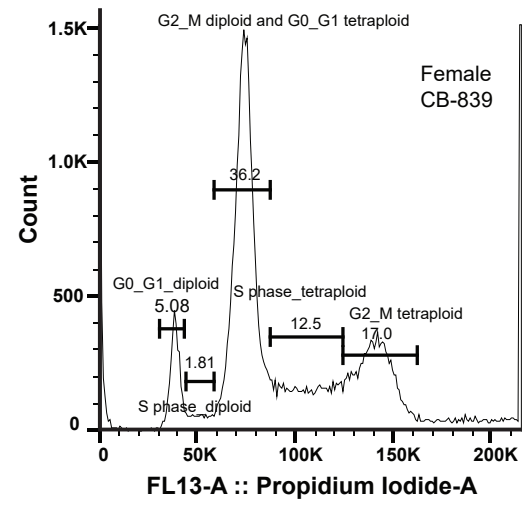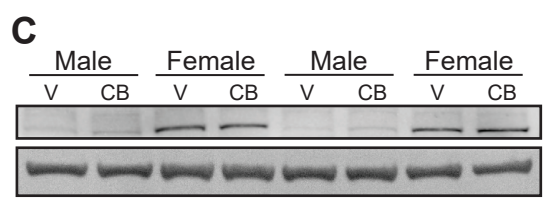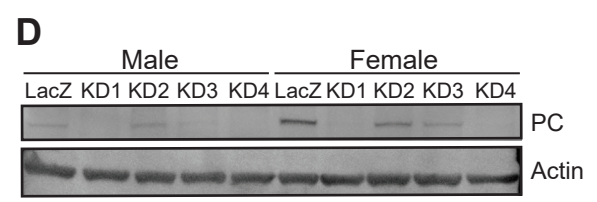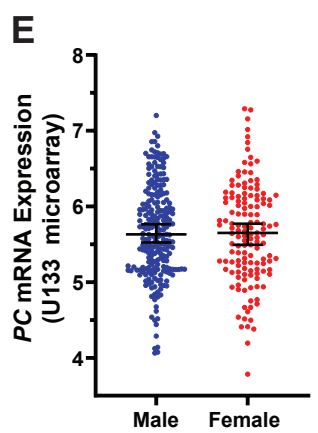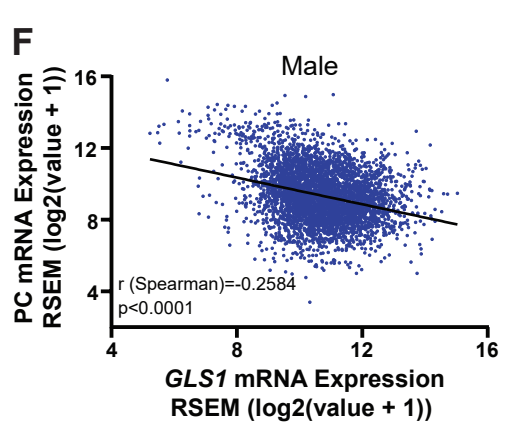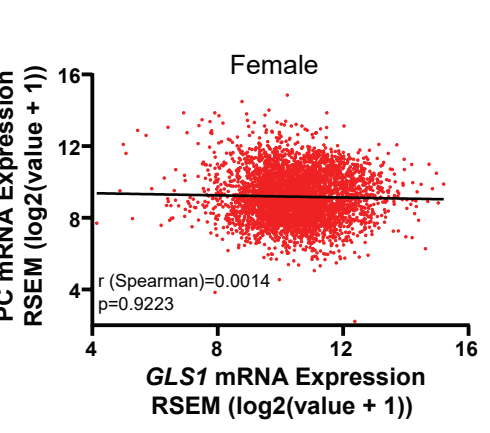

**Figure S5. Male transformed astrocytes require glutamine to replenish their TCA cycle, related to Figure 6 A,** Representative Annexin V histograms of transformed astrocytes treated with CB-839 or vehicle. Histograms shown are representative examples chosen from three independent experiments. **B,** Representative propidium iodide histograms of transformed astrocytes treated with CB-839 or vehicle. The cell cycle subfractions (G0/G1, S-phase, G2/M) are depicted for the diploid and tetraploid cell population. Histograms shown are a representative example chosen from three independent experiments. **C,** Western blot showing PC expression in transformed astrocytes upon treatment with CB-839 or vehicle from two independent experiments. V=vehicle, CB=CB-839. **D,** Western Blot showing PC expression in transformed astrocyte control cells (LacZ ctrl) and transformed astrocyte PC knockdown cells (PC KD). Western blot shown is a representative blot chosen from three independent experiments. **E,** PC mRNA expression levels in n=232 male and n=139 female IDH wild-type GBM patient samples. Data are median +/- 95% CI; t-test. **F,** Nonparametric Spearman correlation between PC and GLS1 mRNA expression levels in n=4714 male and n=4982 female pan-cancer patient samples.



**Table S2. Glioma patient characteristics, related to Figure 2**

| <b>Characteristic</b>        | <b>Female, n = 13<sup>a</sup></b> | <b>Male, n = 15<sup>a</sup></b> | <b>Total, n = 28<sup>a</sup></b> |
|------------------------------|-----------------------------------|---------------------------------|----------------------------------|
| <b>Age (Average, SD)</b>     | 45.62, 10.74                      | 56.47, 13.64                    | 51.43, 13.34                     |
| <b>Race<sup>b</sup></b>      |                                   |                                 |                                  |
| Asian                        | 1 (8%)                            | 1 (7%)                          | 2 (7%)                           |
| Black/African American       | 0 (0%)                            | 1 (7%)                          | 1 (4%)                           |
| Other                        | 1 (8%)                            | 1 (7%)                          | 2 (7%)                           |
| White                        | 11 (84%)                          | 12 (79%)                        | 23 (82%)                         |
| <b>Ethnicity<sup>b</sup></b> |                                   |                                 |                                  |
| Hispanic or Latino           | 0 (0%)                            | 3 (20%)                         | 3 (11%)                          |
| Non-Hispanic                 | 11 (85%)                          | 12 (80%)                        | 23 (82%)                         |
| Unknown                      | 2 (15%)                           | 0 (0%)                          | 2 (7%)                           |
| <b>Diagnosis</b>             |                                   |                                 |                                  |
| Anaplastic astrocytoma       | 3 (23%)                           | 3 (20%)                         | 6 (21%)                          |
| Anaplastic ependymoma        | 1 (8%)                            | 0 (0%)                          | 1 (4%)                           |
| Anaplastic oligodendroglioma | 2 (15%)                           | 0 (0%)                          | 2 (7%)                           |
| Astrocytoma                  | 4 (31%)                           | 0 (0%)                          | 4 (14%)                          |
| Glioblastoma                 | 3 (23%)                           | 11 (73%)                        | 14 (50%)                         |
| Oligodendroglioma            | 0 (0%)                            | 1 (7%)                          | 1 (4%)                           |
| <b>Grade</b>                 |                                   |                                 |                                  |
| 2                            | 4 (31%)                           | 1 (7%)                          | 5 (18%)                          |
| 3                            | 6 (46%)                           | 3 (20%)                         | 9 (32%)                          |
| 4                            | 3 (23%)                           | 11 (73%)                        | 14 (50%)                         |
| <b>IDH status</b>            |                                   |                                 |                                  |
| Mutant                       | 8 (62%)                           | 3 (20%)                         | 11 (39%)                         |
| WT                           | 5 (38%)                           | 11 (73%)                        | 16 (57%)                         |
| Unknown                      | 0 (0%)                            | 1 (7%)                          | 1 (4%)                           |

<sup>a</sup>Statistics presented: n (%)

<sup>b</sup>Self-reported

**Table S3. m/z values monitored for glutamine and glucose labeling studies, related to Figure 3 and Figure 6 and STAR★Methods**

| <b>Metabolite</b>                                                      | <b>m/z monitored</b>                                                                                                                              |
|------------------------------------------------------------------------|---------------------------------------------------------------------------------------------------------------------------------------------------|
| <b>GC/MS [<sup>13</sup>C<sub>5</sub><sup>15</sup>N<sub>2</sub>]Gln</b> |                                                                                                                                                   |
| Alanine                                                                | 260.1, 261.1, 262.1, 263.1, 264.1, 265.1, 266.1, 267.1                                                                                            |
| Fumarate                                                               | 287.1, 288.1, 289.1, 290.1, 291.1, 292.1, 293.1, 294.1                                                                                            |
| Valine                                                                 | 288.1, 289.1, 290.1, 291.1, 292.1, 293.1, 294.1, 295.1, 296.1, 297.1                                                                              |
| Succinate                                                              | 289.1, 290.1, 292.1, 293.1, 294.1, 295.1, 296.1                                                                                                   |
| Leucine                                                                | 302.1, 303.1, 304.1, 305.1, 306.1, 307.1, 308.1, 309.1, 310.1, 311.1, 312.1                                                                       |
| Isoleucine                                                             | 302.1, 303.1, 304.1, 305.1, 306.1, 307.1, 308.1, 309.1, 310.1, 311.1, 312.1                                                                       |
| α-Ketoglutarate                                                        | 346.2, 347.2, 348.2, 349.2, 350.2, 351.2, 352.2, 353.2, 354.2                                                                                     |
| Serine                                                                 | 390.2, 391.2, 392.2, 393.2, 394.2, 395.2, 396.2, 397.2                                                                                            |
| Aspartate                                                              | 418.3, 419.3, 420.3, 421.3, 422.3, 423.3, 424.3, 425.3, 426.3                                                                                     |
| Malate                                                                 | 419.3, 420.3, 421.3, 422.3, 423.3, 424.3, 425.3, 426.3                                                                                            |
| Glutamate                                                              | 432.3, 433.3, 434.3, 435.3, 436.3, 437.3, 438.3, 439.3, 440.3, 441.3                                                                              |
| Citrate                                                                | 591.4, 592.4, 593.4, 594.4, 595.4, 596.4, 597.4, 598.4, 599.4, 600.4                                                                              |
| <b>LC/MS [<sup>13</sup>C<sub>5</sub><sup>15</sup>N<sub>2</sub>]Gln</b> |                                                                                                                                                   |
| Glutathione (red.)                                                     | 306.1, 307.1, 308.1, 309.1, 310.1, 311.1, 312.1, 313.1, 314.1, 315.1, 316.1                                                                       |
| Glutathione (oxid.)                                                    | 611.1, 612.1, 613.2, 614.2, 615.2, 616.2, 617.2, 618.2, 619.2, 620.2, 621.2, 622.2, 623.2, 624.2, 625.2, 626.2, 627.2, 628.2, 629.2, 630.2, 631.2 |
| <b>GC/MS [<sup>13</sup>C<sub>6</sub>]Glc</b>                           |                                                                                                                                                   |
| Fumarate                                                               | 287.1, 288.1, 289.1, 290.1, 291.1, 292.1, 293.1                                                                                                   |
| Aspartate                                                              | 418.3, 419.3, 420.3, 421.3, 422.3, 423.3, 424.3                                                                                                   |
| Malate                                                                 | 419.3, 420.3, 421.3, 422.3, 423.3, 424.3, 425.3                                                                                                   |
| Citrate                                                                | 591.4, 592.4, 593.4, 594.4, 595.4, 596.4, 597.4                                                                                                   |

**Table S6. Metabolite ions monitored for targeted GC/MS analysis, related to Figure 4 and STAR★Methods**

| <b>Metabolites</b>      | <b>Ions</b> | <b>Internal Standards (IS)</b>                   | <b>IS Ions</b> |
|-------------------------|-------------|--------------------------------------------------|----------------|
| Alanine                 | 232.1       | $^{13}\text{C}_3^{15}\text{N}$ L-Alanine         | 235.1          |
| Glycine                 | 218.1       | $^{13}\text{C}_2^{15}\text{N}$ Glycine           | 220.1          |
| Valine                  | 186.2       | $^{13}\text{C}_5^{15}\text{N}$ L-Valine          | 191.2          |
| Leucine                 | 200.2       | $^{13}\text{C}_6^{15}\text{N}$ L-Leucine         | 206.2          |
| Isoleucine              | 200.2       | $^{13}\text{C}_6^{15}\text{N}$ L-Isoleucine      | 206.2          |
| Proline                 | 184.1       | $^{13}\text{C}_5^{15}\text{N}$ L-Proline         | 189.1          |
| Methionine              | 218.1       | $^{13}\text{C}_5^{15}\text{N}$ L-Methionine      | 223.2          |
| Serine                  | 288.1       | $^{13}\text{C}_3^{15}\text{N}$ L-Serine          | 291.1          |
| Threonine               | 303.2       | $^{13}\text{C}_4^{15}\text{N}$ L-Threonine       | 306.2          |
| Phenylalanine           | 302.1       | $^{13}\text{C}_9^{15}\text{N}$ L-Phenylalanine   | 305.1          |
| Aspartate               | 302.1       | $^{13}\text{C}_4^{15}\text{N}$ L-Aspartate       | 305.1          |
| Cysteine                | 302.1       | $^{13}\text{C}_3^{15}\text{N}$ L-Cysteine        | 305.1          |
| Glutamate               | 432.3       | $^{13}\text{C}_5^{15}\text{N}$ L-Glutamate       | 438.3          |
| Asparagine              | 417.3       | $^{13}\text{C}_4^{15}\text{N}_2$ L-Asparagine    | 423.3          |
| Lysine                  | 300.2       | $^{13}\text{C}_6^{15}\text{N}_2$ L-Lysine        | 307.2          |
| Glutamine               | 431.3       | $^{13}\text{C}_5^{15}\text{N}_2$ L-Glutamine     | 438.3          |
| Histidine               | 196.1       | $^{13}\text{C}_6^{15}\text{N}_3$ L-Histidine     | 202.2          |
| Tyrosine                | 302.1       | $^{13}\text{C}_9^{15}\text{N}$ L-Tyrosine        | 305.1          |
| Tryptophan              | 302.1       | $^{13}\text{C}_{11}^{15}\text{N}_2$ L-Tryptophan | 305.1          |
| Cystine                 | 348.2       | $^{13}\text{C}_6^{15}\text{N}_2$ L-Cystine       | 352.2          |
| Pyruvate                | 174.0       | $^{13}\text{C}_3$ Pyruvate                       | 177.0          |
| Lactate                 | 261.1       | $^{13}\text{C}_3$ Lactate                        | 264.1          |
| Citrate                 | 459.3       | $^{13}\text{C}_6$ Citrate                        | 465.3          |
| $\alpha$ -ketoglutarate | 346.1       | $^{13}\text{C}_4$ $\alpha$ -ketoglutarate        | 350.1          |
| Succinic acid           | 289.1       | $^{13}\text{C}_4$ Succinic acid                  | 293.1          |
| Fumaric acid            | 287.1       | $^{13}\text{C}_4$ Fumaric acid                   | 291.1          |
| Malic acid              | 419.3       | $^{13}\text{C}_4$ Malic acid                     | 423.3          |

## **References**

- S1 Prabhu, A.H., Kant, S., Kesarwani, P., Ahmed, K., Forsyth, P., Nakano, I., and Chinnaiyan, P. (2019). Integrative cross-platform analyses identify enhanced heterotrophy as a metabolic hallmark in glioblastoma. *Neuro. Oncol.* 21, 337–347. doi:10.1093/neuonc/noy185.
- S2 Chinnaiyan, P., Kensicki, E., Bloom, G., Prabhu, A., Sarcar, B., Kahali, S., Eschrich, S., Qu, X., Forsyth, P., and Gillies, R. (2012). The Metabolomic Signature of Malignant Glioma Reflects Accelerated Anabolic Metabolism. *Cancer Res.* 72, 5878–5888. doi:10.1158/0008-5472.CAN-12-1572-T.
- S3 Daemen, A., Liu, B., Song, K., Kwong, M., Gao, M., Hong, R., Nannini, M., Peterson, D., Liederer, B.M., de la Cruz, C., et al. (2018). Pan-Cancer Metabolic Signature Predicts Co-Dependency on Glutaminase and De Novo Glutathione Synthesis Linked to a High-Mesenchymal Cell State. *Cell Metab.* 28, 383-399.e9. doi:10.1016/j.cmet.2018.06.003.
